# Supplementary material
Source: publisher figshare collection journal article supplement (https://sage.figshare.com/ndownloader/files/28276346)
Supplement: Supplementary file 1 [file 28276346]

**Supplementary tables**

**S1:** OR and 95% confidence interval for the association between education and T2DM stratified by age

|  | | **No. of  cases** | **Model 1a** | | | **Model 2b** | | | **Model 3c** | | |
| --- | --- | --- | --- | --- | --- | --- | --- | --- | --- | --- | --- |
| OR | 95 % CI | pd | OR | 95 % CI | pd | OR | 95 % CI | pd |
| Age 30-44 years n=388 | | | | | | | | | | | |
| **Education** | High >13 years | 2 | Ref. | - | 0.056 | Ref. | - | 0.063 | Ref. | - | 0.037 |
| Intermediate 10-13 years | 6 | 2.99 | 0.61-14.74 | 3.0 | 0.61-14.87 | 2.94 | 0.57-15.32 |
| Low <10 years | 1 | 18.77 | 1.70-206.8 | 17.69 | 1.59-192.45 | 19.33 | 1.66-224.94 |
| Age: 45-59 years n=394 | | | | | | | | | | | |
| **Education** | High >13 years | 3 | 1 |  | 0.125 | 1 |  | 0.144 | 1 |  | 0.230 |
| Intermediate 10-13 years | 10 | 2.26 | 0.62-8.25 | 2.31 | 0.63-8.51 | 1.71 | 0.45-6.56 |
| Low <10 years | 3 | 5.51 | 1.07-28.35 | 5.21 | 1.00-27.06 | 2.94 | 0.50-17.19 |
| Age: 60+ years n=313 | | | | | | | | | | | |
| **Education** | High >13 years | 4 | 1 |  | 0.059 | 1 |  | 0.035 | 1 |  | 0.022 |
| Intermediate 10-13 years | 19 | 3.35 | 1.10-10.26 | 3.29 | 1.07-10.12 | 3.42 | 1.07-10.94 |
| Low <10 years | 14 | 3.98 | 1.25-12.70 | 4.80 | 1.46-15.81 | 4.45 | 1.27-15.6 |

a Crude

b adjusted for sexand cohabitation

c Adjusted for confounders as in model 2 and further adjusted for BMI, diet, smoking and physical activity

dp-value from Wald test for overall association

**S2:** OR and 95% confidence interval for the association between education and T2DM stratified by sex

|  | | **No. of cases** | **Model 1a** | | | **Model 2b** | | | **Model 3c** | | |
| --- | --- | --- | --- | --- | --- | --- | --- | --- | --- | --- | --- |
| OR | 95 % CI | pd | OR | 95 % CI | pd | OR | 95 % CI | pd |
| Women n=533 | | | | | | | | | | | |
| **Education** | High >13 years | 2 | Ref. | - | 0.006 | Ref. | - | 0.016 | Ref. | - | 0.066 |
| Intermediate 10-13 years | 12 | 5.99 | 1.21-29.75 | 5.49 | 1.10-27.39 | 4.67 | 0.91-23.80 |
| Low <10 years | 8 | 14.18 | 2.68-75.19 | 8.06 | 1.35-48.05 | 5.36 | 0.88-32.80 |
| Men n=562 | | | | | | | | | | | |
| **Education** | High >13 years | 7 | 1 |  | <0.000 | 1 |  | 0.005 | 1 |  | 0.036 |
| Intermediate 10-13 years | 23 | 2.38 | 1.02-5.59 | 2.17 | 0.91-5.15 | 1.80 | 0.73-4.41 |
| Low <10 years | 10 | 7.40 | 2.71-20.23 | 4.45 | 1.57-12.64 | 3.28 | 1.08-9.92 |

a Crude

b adjusted for age and cohabitation

c Adjusted for confounders as in model 2 and further adjusted for BMI, diet, smoking and physical activity

dp-value from Wald test for overall association
